# Supplementary material for: Targeting primary acute myeloid leukemia with a new CXCR4 antagonist IgG1 antibody (PF-06747143)
Source: PubMed Central journal article supplement (PMC5544749; doi:10.1038/s41598-017-07848-8), 2017-08-04
Supplement: 41598_2017_7848_MOESM1_ESM.pdf [file 41598_2017_7848_MOESM1_ESM.pdf]

## Supplemental figures

### Targeting primary acute myeloid leukemia with a new CXCR4 antagonist IgG1 antibody (PF-06747143)

Yanyan Zhang<sup>1-4</sup>, Erika Saavedra<sup>1-4</sup>, Ruoping Tang<sup>5-8</sup>, Yin Gu<sup>9</sup>, Patrick Lappin<sup>10</sup>, Dusko Trajkovic<sup>10</sup>, Shu-Hui Liu<sup>11</sup>, Tod Smeal<sup>9</sup>, Valeria Fantin<sup>9</sup>, Stephane De Botton<sup>1,12,13</sup>, Ollivier Legrand<sup>5-8</sup>, Francois Delhommeau<sup>5-7,14</sup>, Flavia Pernasetti<sup>9\*</sup>, Fawzia Louache<sup>1-4\*</sup>

<sup>1</sup>INSERM, UMR 1170, 114 rue Edouard Vaillant, 94805 Villejuif;

<sup>2</sup>Université Paris-Saclay, Gustave Roussy, Villejuif, France

<sup>3</sup>Gustave Roussy, 94805 Villejuif, France

<sup>4</sup>CNRS GDR 3697 MicroNiT

<sup>5</sup>Sorbonne Universités, UPMC Univ Paris 06, UMR\_S 938, CDR Saint-Antoine, F-75012 Paris, France

<sup>6</sup>INSERM, UMR\_S 938, CDR Saint-Antoine, F-75012 Paris, France

<sup>7</sup>Sorbonne Universités, UPMC Univ Paris 06, GRC n°7, Groupe de Recherche Clinique sur les Myéloproliférations Aiguës et Chroniques MYPAC, F-75012 Paris, France.

<sup>8</sup>AP-HP, Hôpital St Antoine, Service d'Hématologie clinique et de thérapie cellulaire, F-75012 Paris, France

<sup>9</sup>Oncology Research & Development, Pfizer Worldwide Research & Development, San Diego, CA

<sup>10</sup>Drug Safety Research & Development, Pfizer, San Diego, CA

<sup>11</sup>Oncology Research & Development, Pfizer Worldwide Research & Development, San Francisco, CA

<sup>12</sup>Gustave Roussy, Université Paris-Saclay, Service d'Hématologie Clinique

<sup>13</sup>Faculté de médecine Paris-Sud, Kremlin-Bicêtre

<sup>14</sup>AP-HP, Hôpital Saint-Antoine, Service d'hématologie biologique, F-75012 Paris, France

#### Corresponding authors:

\*Fawzia Louache

Mailing address: 114 Rue Edouard Vaillant, 94805, Villejuif Cedex, France

E-mail: [Fawzia.LOUACHE@gustaveroussy.fr](mailto:Fawzia.LOUACHE@gustaveroussy.fr)

Telephone number: (33) 1 42 11 42 33, Fax number: (33) 1 42 11 52 40

\*Flavia Pernasetti

Mailing Address: 10646 Science Center Drive, San Diego CA 92121, USA

Email: [flavia.pernasetti@pfizer.com](mailto:flavia.pernasetti@pfizer.com)

Telephone: 1 (858) 622-7587

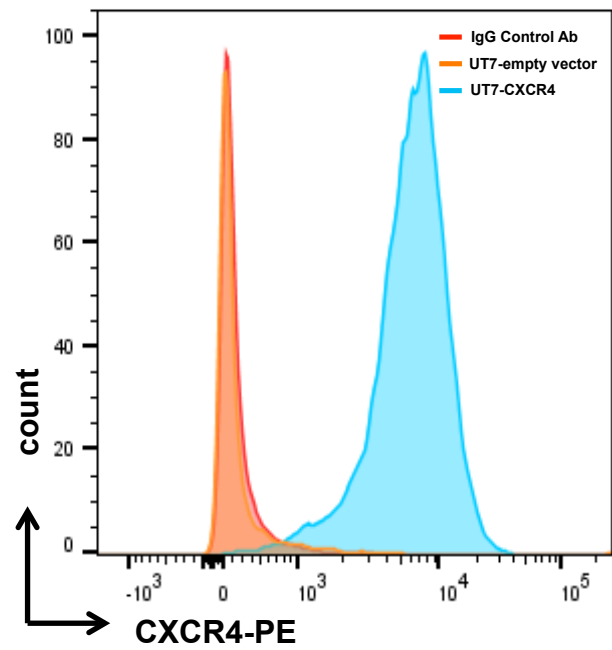

**Supplemental Figure 1**

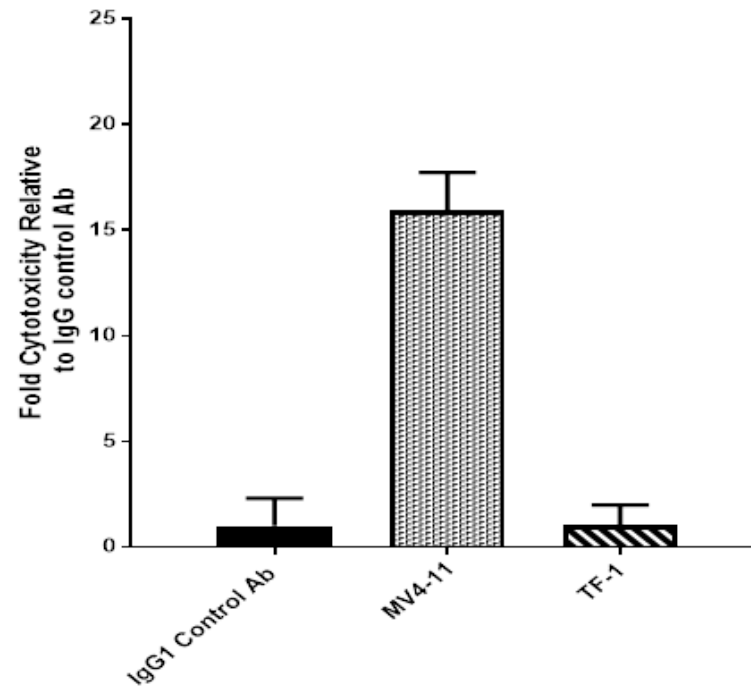

**Supplemental Figure 2**

Zhang Y et al

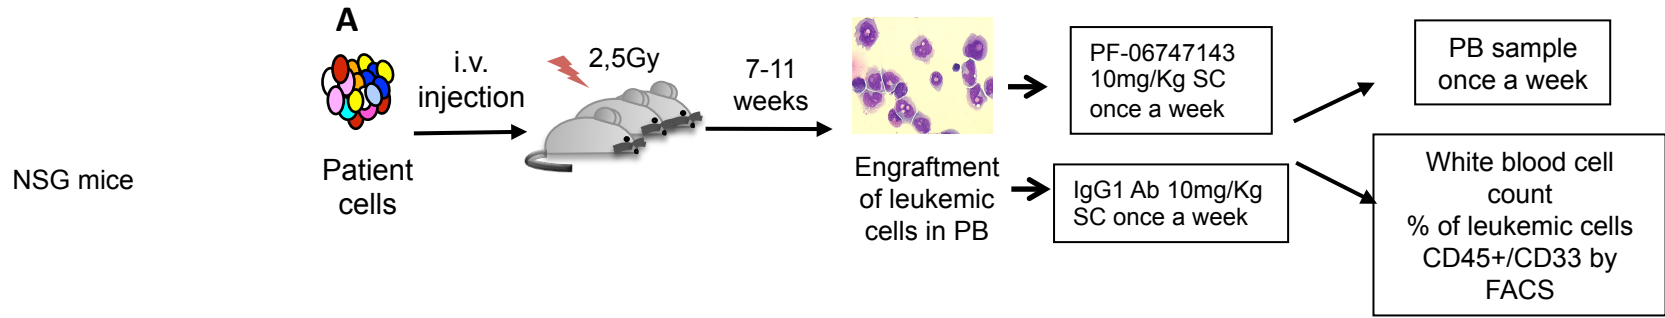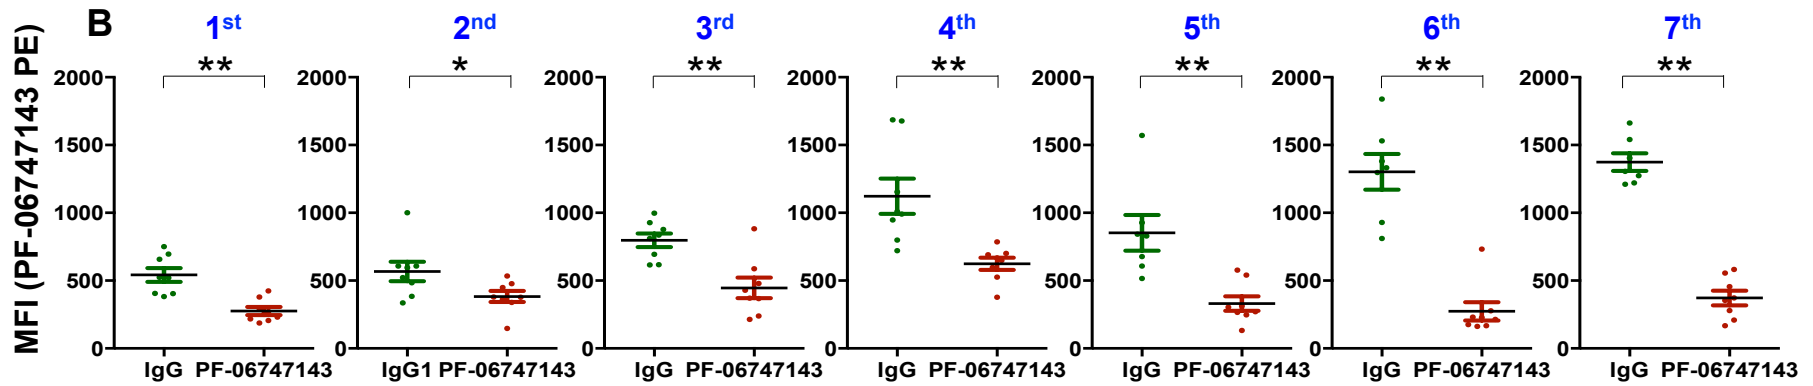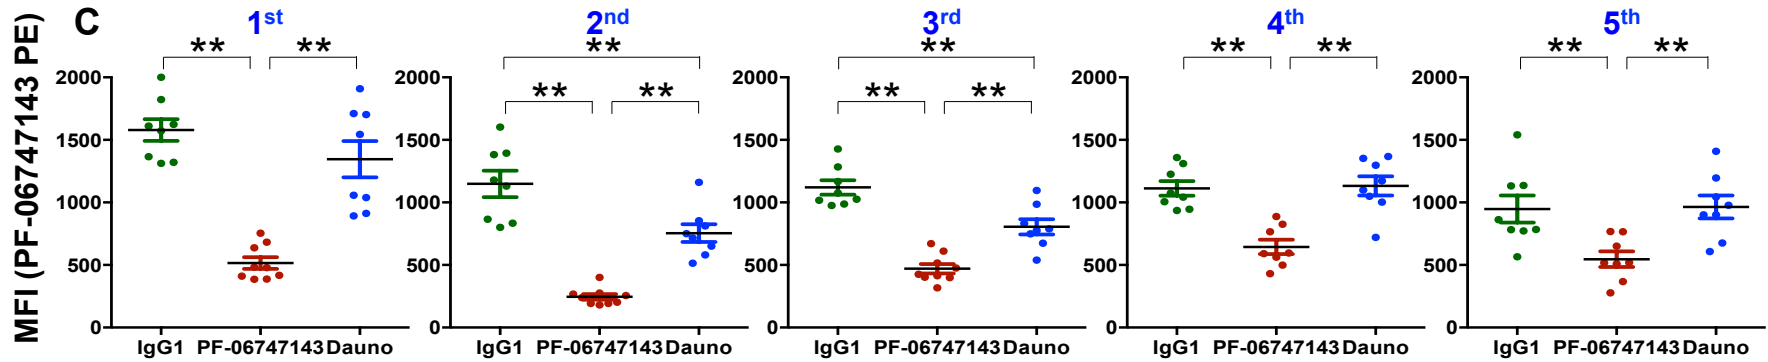

Supplemental Figure 3

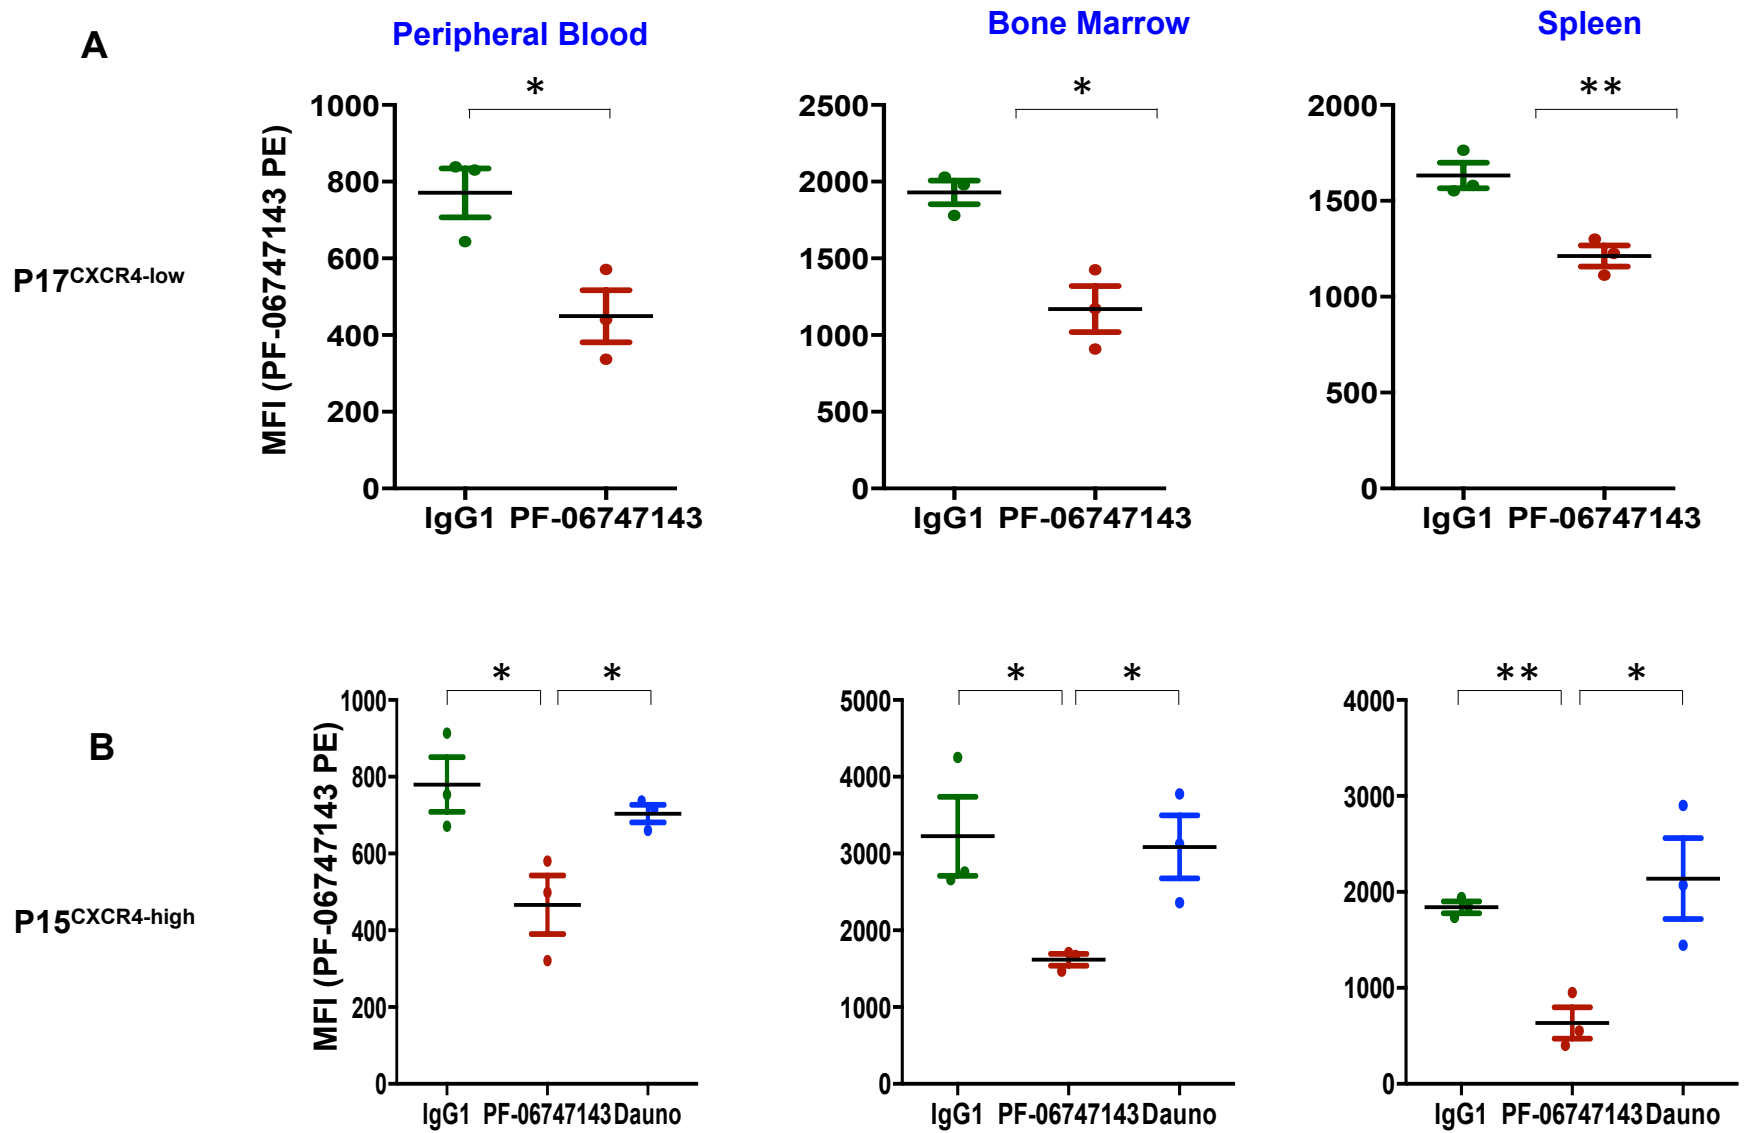

**Supplemental Figure 4**

**Supplemental Table I: Characteristics of the two AML patient samples studied in PDX model**

| <b>patients (No.)</b>           | <b>Gender</b> | <b>age</b> | <b>P/S AML*</b> | <b>FAB</b> | <b>Karyotype</b>        | <b>WBC(x10<sup>9</sup>/L)</b> |
|---------------------------------|---------------|------------|-----------------|------------|-------------------------|-------------------------------|
| <b>P15<sup>CXCR4-high</sup></b> | <b>M</b>      | <b>81</b>  | <b>S</b>        | <b>5</b>   | <b>Normal</b>           | <b>68</b>                     |
| <b>P17<sup>CXCR4-low</sup></b>  | <b>F</b>      | <b>32</b>  | <b>S</b>        | <b>5</b>   | <b>-7, Inv3, -11p13</b> | <b>25,5</b>                   |

**\*: primary leukemia, S: secondary leukemia**

## Supplemental figure legends

**Supplemental Figure 1:** Specificity of PF-06747143 antibody binding to CXCR4. Representative histograms of flow cytometry comparing PF-06747143 antibody binding to the UT7 CXCR4-negative human AML cell line transduced with empty vector (negative control) or, transduced with CXCR4 vector (UT7-CXCR4).

**Supplemental Figure 2:** PF-06747143 did not induce ADCC on a CXCR4-negative AML TF-1 cell line. ADCC activity was evaluated by incubating PF-06747143 (100nM) with CXCR4-negative AML TF-1 cell line or CXCR4-positive MV4-11 AML cells in the presence of NK92 158V effector cells.

**Supplemental Figure 3:** (A) Experimental design for evaluation of PF-06747143 efficacy on leukemic development. Mice were engrafted with CXCR4 low (P17<sup>CXCR4-low</sup>) and CXCR4 high (P15<sup>CXCR4-high</sup>) primary patient cells, 5 x10<sup>6</sup> /per mouse. After leukemia establishment, at 7 weeks for P17<sup>CXCR4-low</sup> and 10 weeks for P15<sup>CXCR4-high</sup> the mean percentage of AML cells in the peripheral blood was 7% and 2%, respectively. Mice were then divided into two or three groups, 8 mice/group, which received weekly subcutaneous treatment with IgG1 control, PF-06747143 Ab or daunorubicin (only for P15<sup>CXCR4-high</sup> PDX model). Twenty-four hours after each weekly treatment, quantitative analyses of PF-06747143-PE binding (mean fluorescence on human PB CD45<sup>+</sup> cells were performed. Each group comprises 8 mice. **B)** P17<sup>CXCR4-low</sup> PDX and **C)** P15<sup>CXCR4-high</sup> PDX. Data for each animal is shown and the horizontal bar represents the mean. \*  $P < 0,05$  ; \*\*  $P < 0,01$  assessed by t-test.

**Supplemental Figure 4: CXCR4 receptor occupancy by injected PF-06747143 antibody on blood, BM, and spleen AML cells at the end of in PDX efficacy studies.** Quantitative analyses of PF-06747143-PE were performed on human CD45<sup>+</sup> cells derived from BM, spleen, and blood at 24 hours post last antibody treatment, for each PDX model: **A)** P17<sup>CXCR4-low</sup> PDX and **B)** P15<sup>CXCR4-high</sup> PDX. Each group comprises 8 mice. Data for each animal is represented and the horizontal bar is the average. \*  $P < 0.05$  and \*\*  $P < 0,01$  assessed by t-test.
